# Supplementary material
Source: publisher site journal article supplement (https://www.degruyterbrill.com/publication/dbid/klemp/downloadAsset/KLEMP_KLEMP_Herausgeber_CV.pdf)
Supplement: Supplementary file 1 [file KLEMP_KLEMP_Herausgeber_CV.pdf]

# Über die Herausgeber von „Klemperer Online“

**Walter Nowojski**, geboren am 12. November 1931 in Annahütte (Niederlausitz); nach Abitur Studium der Germanistik in Berlin; 1956 Verlagslektor, ab 1959 Literaturredakteur beim DDR-Rundfunk, später Chefdramaturg des Hörspiels; 1969 Wechsel zum DDR-Fernsehen, Leiter des Bereichs Dramatische Kunst; 1974 wegen politischer Differenzen Entlassung und Hausverbot; 1975–1990 Chefredakteur der Zeitschrift „Neue Deutsche Literatur“ (NDL).

Seit 1978 Arbeit am Nachlass Victor Klemperers; Herausgabe von „Curriculum vitae“ (1989) und der Tagebücher 1918–1959 („Ich will Zeugnis ablegen bis zum letzten. Tagebücher 1933–1945“, 2 Bde., Berlin 1995; „Leben sammeln, nicht fragen, wozu und warum. Tagebücher 1918–1932“, 2 Bde., Berlin 1996; „So sitze ich denn zwischen allen Stühlen. Tagebücher 1945–1959“, 2 Bde., Berlin 1999); Mitherausgeber von „Victor Klemperer – Ein Leben in Bildern“ (Berlin 1999), Mitarbeit an „Mein Leben ist so sündhaft lang“. Dokumentarfilm (1998), Herausgabe der Kommentierten Gesamtausgabe der Tagebücher 1933–1945 als CD-ROM (Berlin 2007); Arbeit an der Herausgabe des Briefwechsels von Victor Klemperer (postum erschienen 2017).

Ab 2007 Arbeit an der Digitalisierung des Gesamtmanuskripts der Tagebücher Victor Klemperers 1918–1932 und 1945–1959.

Walter Nowojski starb am 8. November 2012 in Berlin.

**Christian Löser**, geboren am 26. 8. 1936 in Bad Warmbrunn (Niederschlesien), nach 1945 aufgewachsen in Dresden; 1954 Abitur an der EOS „Klement Gottwald“ in Dresden-Reick, ab 1954 Studium der Germanistik und der Kunstwissenschaft an der Humboldt-Universität Berlin (Diplom 1961), ab Sept. 1961 Wissenschaftlicher Mitarbeiter beim Deutschen Schriftstellerverband Berlin (DSV; später Schriftstellerverband der DDR), ab Sept. 1975 bis März 1995 Redakteur der Zeitschrift „Neue Deutsche Literatur“ (NDL).

Ab 1995 bis 1999 Mitarbeit an der Edition der Tagebücher von Victor Klemperer 1918–1932 („Leben sammeln, nicht fragen, wozu und warum“, 2 Bde., Berlin 1996) und 1945–1959 („So sitze ich denn zwischen allen Stühlen“, 2 Bde., Berlin 1999), ab 2006 an der Kommentierten Gesamtausgabe der Tagebücher 1933–1945 als CD-ROM (Berlin 2007), ab 2006 bis 2012 Mitarbeit an der hier vorliegenden digitalen Kommentierten Gesamtausgabe der Tagebücher 1918–1959, seit dem Tod von Walter Nowojski (8. November 2012) bis Mitte 2018 alleinige Fortführung dieser Arbeit; mit Nele Holdack Herausgabe von: Victor Klemperer, „Man möchte immer weinen und lachen in einem. Revolutionstagebuch 1919“, Aufbau Verlag, Berlin 2015; Mitarbeit an der von Walter Nowojski vorbereiteten, von Nele Holdack herausgegebenen Brief-

ausgabe: Victor Klemperer, „Warum soll man nicht auf bessere Zeiten hoffen. Ein Leben in Briefen“, Aufbau Verlag, Berlin 2017, sowie an der überarbeiteten Neuausgabe von „Ich will Zeugnis ablegen bis zum letzten. Tagebücher 1933–1945“ (2 Bde., Aufbau Verlag, Berlin 2017).
